# Supplementary material
Source: publisher figshare collection journal article supplement (https://frontiersin.figshare.com/ndownloader/files/23722592)
Supplement: Supplementary file [file 23722592]

## University Ticket

Picture  
(not printed)

Did you know that you as a student of the  
University of XYZ

benefit from our **cultural ticket**?

This allows you to enjoy perks or even in  
free entry to some cultural highlights here  
in Kassel and discover your new home.

The following institutions participate,  
Among Others:

- + **theater**
- + **comedy**
- + **museum**
- + **event locations**
- + **...und manie more**

The city is looking forward to seeing you!

## Uniparties

Let's Celebrate!

Picture  
(not printed)

### "Welcome-Paty"

In the first week of the semester, it's time to  
say 'Welcome dear Freshman! 'and the old  
primary school in XYZ will be converted into  
the ultimate venue! With hot beats and  
trendy DJ's from the region you can dance on  
several floors, celebrate the start of  
University and get to know new fellow  
students! Drinks for a small budget will also  
be waiting for you.

About all other parties, you will always be  
informed on the campus or through our  
**Facebookgroup**. Bye for now)

Picture  
(not printed)

# U N I V E R S I T Ä T

After high school is before college life

Here you will find current  
benefits of the University of XYZ:

- + **University sports:**  
Stay in motion!
- + **Workshops:**  
Train your Soft Skills!
- + **Semester abroad:**  
Around The World!
- + **Cultural ticket:**  
Discover your city!
- + **Unipartys:**  
Let's Celebrate!

Picture  
(not printed)

## University sports

### Sport is fun and healthy...

... and in XYZ you will find great conditions for a sporty lifestyle.

Our sports program has been expanded to include a number of interesting sports in which you, of course, as a student of the University of XYZ, can participate for free.

Look forward to:

+ Full body exercise  
+ Power Yoga  
+ Women's soccer  
+ Ju-Jitsu  
+ Hot Iron Workout  
+ Strength-endurance-

Picture  
(not printed)

Picture  
(not printed)

Further information and all other sports offers can be found on our website:  
[www.sport-uni-xyz.de](http://www.sport-uni-xyz.de)

Picture  
(not printed)

Picture  
(not printed)

Picture  
(not printed)

Picture  
(not printed)

## Workshops

Picture  
(not printed)

Picture  
(not printed)

### Expand your Soft-Skills!

Picture  
(not printed)

*Nowadays Employers expect not only theoretical knowledge and good grades but a convincing appearance is also crucial for the career start. The University of XYZ emphasizes this with a range of workshops, that you can visit at any time during your studies. For example, the following topics are waiting for you:*

- + **Presentation techniques**
- + **Moderation and negotiation techniques**
- + **Communication & Interviewing**

We invite you to our welcome event for this topic!

Picture  
(not printed)

## Semester abroad

Picture  
(not printed)

Picture  
(not printed)

### around the world – Study abroad!

Ever thought of a stay abroad? Take advantage of the many benefits of studying abroad;

**Learn the language the country and meet new people, collect experiences for your life and your CV!**

The university not only supports studying abroad, but also continuously expands its network of partner universities around the world. We regularly provide informational events on the subject, such as **Erasmus Meet & Greet**. You will be informed of upcoming appointments at the latest in the

first week informed.

**We look forward to seeing you?**

Picture  
(not printed)

Here you can write down things that you think can be optimized and that you cannot change:

[illegible]
